# Supplementary material
Source: Elsevier journal article supplement (https://www.sciencedirect.com/science/article/pii/S2530016419300588)
Supplement: mmc1 [file S2530016419300588:mmc1.doc]

**Supplemental Table 1**. Characteristics of study subjects according to LDL-cholesterol levels.

|  | LDL-cholesterol <100 mg/dL  (n = 65) | | LDL-cholesterol  ≥100 mg/dL  (n = 175) | | *p* value |
| --- | --- | --- | --- | --- | --- |
| **Clinical characteristics** | | | | | |
| Men | | 33 (50.8) | | 87 (49.7) | 0.885 |
| Age (years)  ≥40 years-old | | 49.9±10.2  61 (93.8) | | 47.8±9.9  142 (81.1) | 0.147  0.015 |
| Premature CVD in first-degree relatives* | | 8 (12.3) | | 28 (16) | 0.477 |
| Current smokers | | 17 (26.2) | | 51 (29.1) | 0.648 |
| Hypertension | | 22 (33.8) | | 43 (24.6) | 0.151 |
| SBP (mmHg) | | 127±16 | | 127±15 | 0.861 |
| DBP (mmHg) | | 79±9 | | 80±9 | 0.778 |
| BMI (kg/m2) | | 26.7±4.6 | | 26.2±4.0 | 0.378 |
| Waist circumference (cm)  Men  Women | | 94.0±13.8  98.4±12.4  89.1±13.8 | | 92.0±12.0  95.8±10.9  87.8±11.8 | 0.334  0.321  0.663 |
| T1D duration (years) | | 28.2±9.5 | | 26.1±8.8 | 0.100 |
| Impaired hypoglycemia awareness** | | 6 (9.4) | | 24 (14) | 0.341 |
| Diabetic nephropathy | | 10 (15.4) | | 18 (10.3) | 0.274 |
| Diabetic retinopathy | | 27 (41.5) | | 64 (36.6) | 0.481 |
| CSII therapy | | 20 (30.8) | | 61 (34.9) | 0.552 |
| **Laboratory characteristics** | | | | | |
| Hemoglobin A1c (%)  Hemoglobin A1c <7%  Hemoglobin A1c <7.5% | | 7.6±0.9  17 (26.2)  31 (47.7) | | 7.7±1.0  38 (21.7)  86 (49.1) | 0.788  0.467  0.842 |
| Serum creatinine (mg/dL) | | 0.82±0.18 | | 0.81±0.18 | 0.901 |
| eGFR (CKD-EPI; ml/min/1.73 m2) | | 95.7±16.8 | | 98.0±16.1 | 0.334 |
| Total cholesterol (mg/dL) | | 165±16 | | 205±27 | <0.001 |
| HDL-cholesterol (mg/dL) | | 60±15 | | 61±17 | 0.843 |
| LDL-cholesterol (mg/dL) | | 89±9 | | 127±19 | <0.001 |
| Triglycerides (mg/dL) | | 67 (51-85) | | 76 (61-103) | 0.005 |
| Non-HDL cholesterol (mg/dL) | | 104±12 | | 144±22 | <0.001 |
| Total cholesterol/HDL-cholesterol | | 2.87±0.67 | | 3.54±0.76 | <0.001 |
| **Pharmacological treatment** | | | | | |
| Statins | | 39 (60) | | 65 (37.1) | 0.001 |
| Ezetimibe | | 1 (1.5) | | 5 (2.9) | 0.561 |
| ACEi / ARB | | 23 (35.4) | | 49 (28) | 0.267 |
| Antiplatelet drugs | | 9 (13.8) | | 13 (7.4) | 0.126 |

Data are shown as n (percentage), median (Q1-Q3), or mean ± standard deviation

*p* values for group comparisons are reported

One patient couldn’t be classified because triglyceride levels were >400 mg/dL, so LDL-cholesterol couldn't be estimated by the Friedewald formula.

ARB: angiotensin receptor blocker; BMI: Body Mass Index; CVD: cardiovascular disease; CSII: continuous subcutaneous insulin infusion; DBP: diastolic blood pressure; ACEi: angiotensin-converting enzyme inhibitor; eGFR: estimate glomerular filtration rate; HDL: high density lipoprotein; LDL: low density lipoprotein; SBP: systolic blood pressure; T1D: type 1 diabetes

* Defined as <55 years in men and <65 years in women.

** Defined as Clarke test score >3 points. Missing value n=5.
