# Supplementary material
Source: Elsevier journal article supplement (https://www.sciencedirect.com/science/article/pii/S2530016419300588)
Supplement: mmc2 [file S2530016419300588:mmc2.doc]

**Supplemental Table 2:** Clinical determinants of LDL-cholesterol <100 mg/dL: multiple regression analysis.

| Variable | OR 95%CI | *p* value |
| --- | --- | --- |
| Gender (men) | 0.95 (0.50-1.78) | 0.866 |
| Age ≥40 years | 2.97 (0.94-9.37) | 0.064 |
| Premature CVD in first-degree relatives* | 0.72 (0.28-1.82) | 0.486 |
| Current smokers | 0.87 (0.41-1.81) | 0.703 |
| Hypertension | 0.95 (0.45-2.01) | 0.890 |
| BMI (kg/m2) | 1.02 (0.95-1.10) | 0.542 |
| T1D duration (years) | 1.02 (0.98-1.06) | 0.445 |
| Impaired hypoglycemia awareness** | 0.69 (0.25-1.91) | 0.475 |
| Diabetic nephropathy | 1.48 (0.55-3.95) | 0.434 |
| Diabetic retinopathy | 0.89 (0.43-1.82) | 0.745 |
| Hemoglobin A1c (%) | 0.97 (0.68-1.37) | 0.852 |
| eGFR (CKD-EPI; ml/min/1.73 m2) | 1.002 (0.98-1.02) | 0.879 |
| Statin treatment | 2.36 (1.24-4.51) | 0.009 |

Logistic regression analysis for LDL-cholesterol <100 mg/dL (odds ratio and 95% confidence interval are shown) including all the variables in the rows.

BMI: Body Mass Index; CVD: cardiovascular disease; eGFR: estimate glomerular filtration rate; T1D: type 1 diabetes.

* Defined as <55 years in men and <65 years in women.

** Defined as Clarke test >3 points.
